# Supplementary material for: Origin of the relaxation barriers in a family of MReIV(CN)2 single-chain magnets (M = MnII, NiII, and CoII): a theoretical investigation
Source: Royal Society of Chemistry journal article supplement (doi:10.1039/c4nj01491j), 2014-10-28
Supplement: c4nj01491j1.pdf [file c4nj01491j1.pdf]

Electronic Supplementary Material (ESI) for New Journal of Chemistry. This journal is © The Royal Society of Chemistry and the Centre National de la Recherche Scientifique 2014

## Supporting information

### Origin of the Relaxation Barriers in a Family of $M\text{Re}^{\text{IV}}(\text{CN})_2$ Single-Chain Magnets ( $M = \text{Mn}^{\text{II}}, \text{Ni}^{\text{II}}, \text{Co}^{\text{II}}$ ): A Theoretical Investigation

Yi-Quan Zhang,\* and Cheng-Lin Luo

*Jiangsu Key Laboratory for NSLSCS, School of Physical Science and Technology, Nanjing Normal University, Nanjing 210023, P. R. China*

\*Corresponding author E-mail: [zhangyiquan@nynu.edu.cn](mailto:zhangyiquan@nynu.edu.cn)

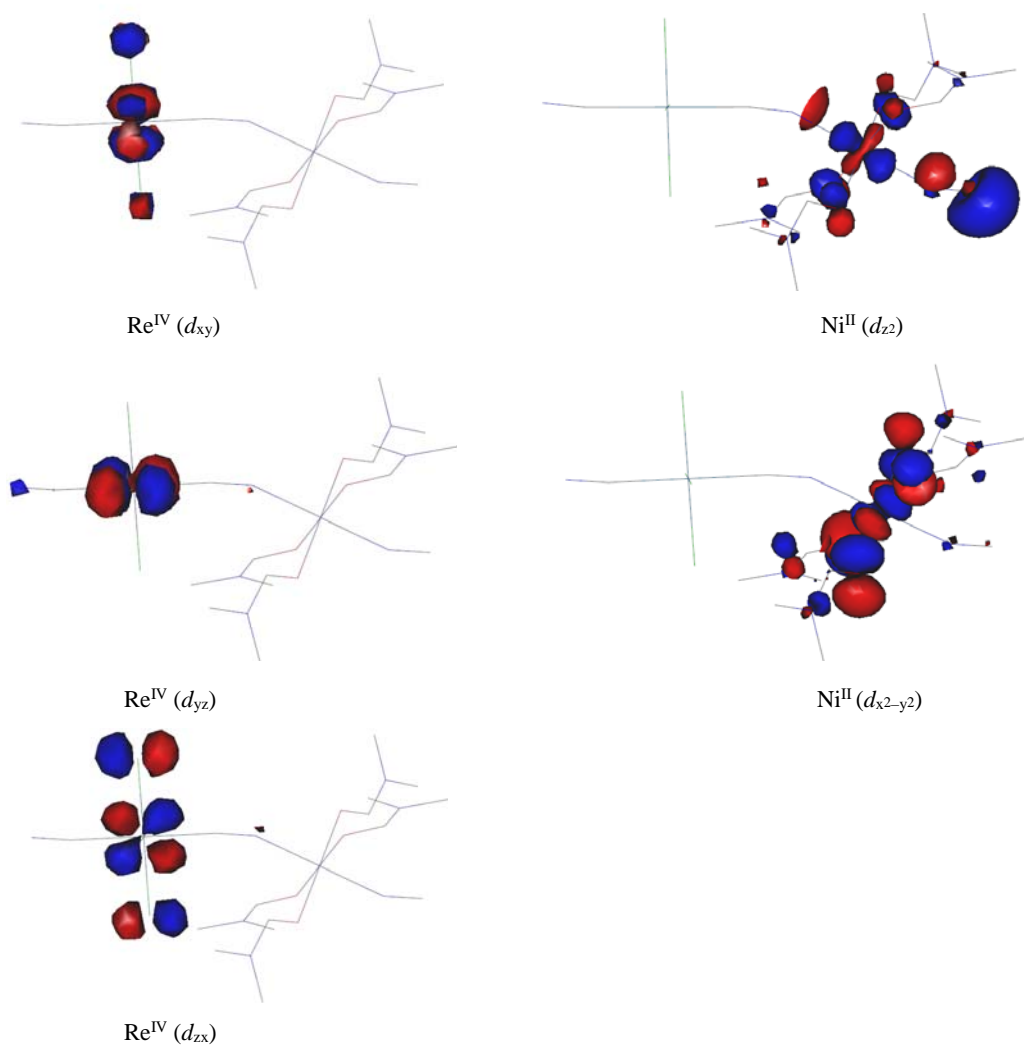

**Figure S1.** Magnetic orbitals on the  $\text{Re}^{\text{IV}}$  (left) and  $\text{Ni}^{\text{II}}$  (right) of **2** in the low-spin state.

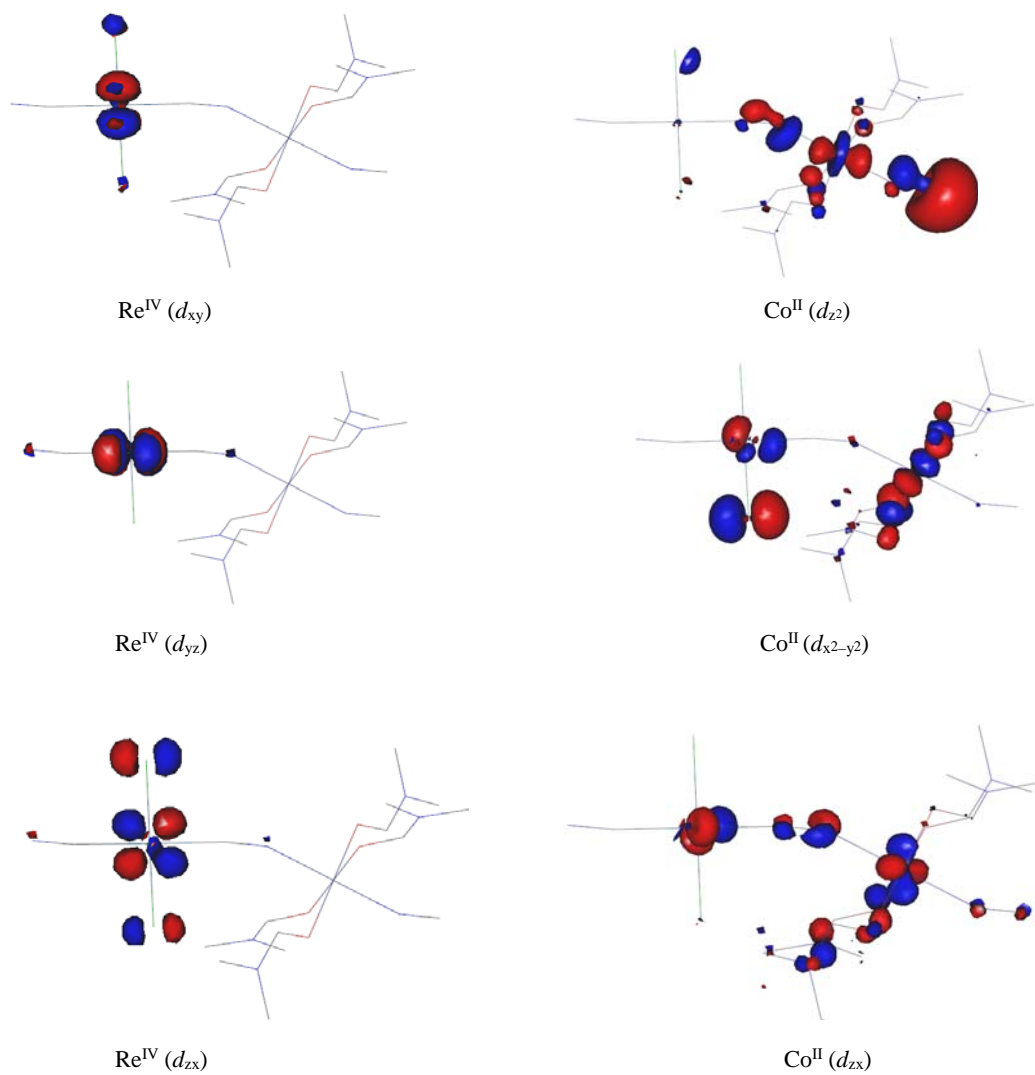

**Figure S2.** Magnetic orbitals on the  $\text{Re}^{\text{IV}}$  (left) and  $\text{Co}^{\text{II}}$  (right) of **3** in the low-spin state.
